# Supplementary material for: Co-Infection with Three Mycoviruses Stimulates Growth of a Monilinia fructicola Isolate on Nutrient Medium, but Does Not Induce Hypervirulence in a Natural Host
Source: PubMed Central journal article supplement (PMC6356717; doi:10.3390/v11010089), 2019-01-21
Supplement: viruses-11-00089-s001.pdf [file viruses-11-00089-s001.pdf]

## Supplementary Materials:

**Table S1.** *Monilinia* isolates from Western Australia and their mycovirus-infection status.

| Isolate code | <i>Monilinia</i> species | Prunus host         | Region of collection | Collection year | Mycoviruses detected <sup>a</sup> |
|--------------|--------------------------|---------------------|----------------------|-----------------|-----------------------------------|
| M50          | <i>M. laxa</i>           | <i>P. domestica</i> | Perth Hills          | 2016            | none                              |
| M52          | <i>M. laxa</i>           | <i>P. persica</i>   | Perth Hills          | 2016            | none                              |
| M53          | <i>M. laxa</i>           | <i>P. persica</i>   | Perth Hills          | 2016            | none                              |
| M61          | <i>M. laxa</i>           | <i>P. armeniaca</i> | Pemberton            | 2016            | none                              |
| M67          | <i>M. laxa</i>           | <i>P. domestica</i> | Pemberton            | 2016            | none                              |
| M68          | <i>M. laxa</i>           | <i>P. domestica</i> | Nannup               | 2016            | none                              |
| M81          | <i>M. laxa</i>           | <i>P. persica</i>   | Perth Hills          | 2016            | none                              |
| M82          | <i>M. laxa</i>           | <i>P. persica</i>   | Perth Hills          | 2016            | FpV1                              |
| M84          | <i>M. laxa</i>           | <i>P. persica</i>   | Perth Hills          | 2016            | FpV1, BVF                         |
| M112         | <i>M. laxa</i>           | <i>P. armeniaca</i> | Perth Hills          | 2016            | none                              |
| M123         | <i>M. laxa</i>           | <i>P. persica</i>   | Perth Hills          | 2016            | none                              |
| M128         | <i>M. laxa</i>           | <i>P. persica</i>   | Pemberton            | 2016            | none                              |
| M133         | <i>M. laxa</i>           | <i>P. persica</i>   | Perth Hills          | 2016            | none                              |
| M136         | <i>M. laxa</i>           | <i>P. persica</i>   | Perth Hills          | 2016            | none                              |
| M138         | <i>M. laxa</i>           | <i>P. armeniaca</i> | Donnybrook           | 2016            | none                              |
| M139         | <i>M. laxa</i>           | <i>P. armeniaca</i> | Donnybrook           | 2016            | none                              |
| M140         | <i>M. laxa</i>           | <i>P. armeniaca</i> | Donnybrook           | 2016            | BVF                               |
| M141         | <i>M. laxa</i>           | <i>P. armeniaca</i> | Donnybrook           | 2016            | none                              |
| M186         | <i>M. fructicola</i>     | <i>P. persica</i>   | Perth Hills          | 2017            | none                              |
| M187         | <i>M. fructicola</i>     | <i>P. persica</i>   | Perth Hills          | 2017            | none                              |
| M188         | <i>M. fructicola</i>     | <i>P. persica</i>   | Perth Hills          | 2017            | none                              |
| M189         | <i>M. fructicola</i>     | <i>P. armeniaca</i> | Perth Hills          | 2017            | none                              |
| M191         | <i>M. fructicola</i>     | <i>P. armeniaca</i> | Perth Hills          | 2017            | none                              |
| M192         | <i>M. fructicola</i>     | <i>P. armeniaca</i> | Perth Hills          | 2017            | none                              |
| M193         | <i>M. fructicola</i>     | <i>P. armeniaca</i> | Perth Hills          | 2017            | none                              |
| M194         | <i>M. fructicola</i>     | <i>P. armeniaca</i> | Perth Hills          | 2017            | none                              |
| M195         | <i>M. fructicola</i>     | <i>P. persica</i>   | Kirup                | 2017            | none                              |
| M196         | <i>M. fructicola</i>     | <i>P. persica</i>   | Kirup                | 2017            | SsHV2, FpV1, BVF                  |

a. SsHV2, Sclerotinia sclerotiorum hypovirus 2; FpV1, Fusarium poae virus 1; BVF, Botrytis virus F.

**Table S2.** Primers used to fill the gaps of the virus sequences.

| Mycoviruses                                                | Primer names | Primer sequences     |
|------------------------------------------------------------|--------------|----------------------|
| Sclerotinia sclerotiorum hypovirus 2 (SsHV2-Monilinia-TNS) | M196HypoF1   | ATGAAGAAGGATTCGGTGA  |
|                                                            | M196HypoF2   | TTATCCAAGTGTCCGGGCTC |
|                                                            | M196HypoR2   | GAGCCCGGACAGTTGGATAA |
|                                                            | M196HypoF3   | AATTGCGACCTTTCAGTTTC |
|                                                            | M196HypoR3   | GAAACTGAAAGGTCGCAATT |
|                                                            | M196HypoF4   | TACGCAAGAGCATCCGGTTC |
|                                                            | M196HypoR4   | GAACCGGATGCTCTTGCGTA |
|                                                            | M196HypoF5   | TGACTCGGCAGAAGAATTGT |
|                                                            | M196HypoR5   | ACAATTCTTCTGCCGAGTCA |
|                                                            | M196HypoF6   | GAAAGCTTCGCAACAAGAAG |
|                                                            | M196HypoR6   | CTTCTTGTTGCGAAGCTTTC |

|             |                       |
|-------------|-----------------------|
| M196HypoF7  | TATGATCCGCAGATACATGT  |
| M196HypoR7  | ACATGTATCTGCGGATCATA  |
| M196HypoF8  | TATTTAAGGAAATGGGACCG  |
| M196HypoR8  | CGGTCCCATTTCCTTAAATA  |
| M196HypoF9  | ATGTGGCCTATCCCTTCCAA  |
| M196HypoR9  | TTGGAAGGGATAGGCCACAT  |
| M196HypoF10 | GCCAAGAATGAATGGATATG  |
| M196HypoR10 | CATATCCATTTCATTCTTGGC |
| M196HypoF11 | CATATCCATTTCATTCTTGGC |
| M196HypoR11 | GCCAAGAATGAATGGATATG  |
| M196HypoF12 | GAGGTGACAGGGTGCCTGTT  |
| M196HypoF12 | AACAGGCACCCTGTACCTC   |
| M196HypoF13 | AGTATAAAAAGGTGTACACC  |
| M196HypoR13 | GGTGTACACCTTTTTATACT  |
| M196HypoF14 | CAATATGTTTTATCTTTTGGC |
| M196HypoR14 | GCCAAAAGATAAACATATTG  |
| M196HypoF15 | GATGACCTTCCAGATGAAGA  |
| M196HypoR15 | TCTTCATCTGGAAGGTCATC  |
| M196HypoF16 | AATGAAGCCTTCGAAGAAGG  |
| M196HypoR16 | CCTTCTTCGAAGGCTTCATT  |
| M196HypoF17 | TCTTGAACGGGAGCATTCT   |
| M196HypoR17 | AGAAATGCTCCCCTTCAAGA  |
| M196HypoF18 | ATGGGAATGTTTACAAGGAT  |
| M196HypoR18 | ATCCTTGTAACATTCCCAT   |
| M196HypoF19 | TTGAGCGTGTGGCAAGGCCT  |
| M196HypoR19 | AGGCCTTGCCACACGCTCAA  |
| M196HypoF20 | GATGCCCATCGCATGATTGA  |
| M196HypoR20 | TCAATCATGCGATGGGCATC  |
| M196HypoF21 | AGACAGGATGCATTTCGTC   |
| M196HypoR21 | TTGACGAATGCATCCTGTCT  |
| M196HypoF22 | TAATCTGGAACACGCAACGA  |
| M196HypoR22 | TCGTTGCGTGTCCAGATTA   |
| M196HypoR23 | TCATCTGTGGCGTTTCTCCT  |
| M196HypoR24 | ATTTCTGCAATACGTAGTC   |
| Gaphypo5    | ATCATACGGAGTGCCTCACT  |
| Gaphypo3    | AGGGTGACTCTAGATACACA  |
| 5'hypo2     | CCTGTTGTTACCTGTCAGAC  |
| 5'hypo1     | AGTAGTGCCTAGAAGAATG   |
| 3'hypoR2    | CTTCGTCAAGATTGTCGATC  |
| 3'hypoR1    | AGAACGCGTCACGTTCCCGC  |

---

Botrytis virus F (BVF-Monilinia-TNS)

|                |                          |
|----------------|--------------------------|
| M196BotVF5     | AAACGCCUGAAUCGUACGGCCACC |
| M196BotVF800R  | TTGGATATGACAAAGATATGG    |
| M196BotVF800F  | CCATATCTTTGTCATATCCAA    |
| M196BotVF1500F | CTTGCCACTATCACTGCCGC     |
| M196BotVF1500R | AGTCGAGCATATTGCTTAGC     |
| M196BotVF3000F | GCTAAGCAATATGCTCGACT     |
| M196BotVF2200R | GCGTAGACTTCTTCAGTGAG     |
| M196BotVF2200F | CTCACTGAAGAAGTCTACGC     |
| M196BotVF1500R | GCGGCAGTGATAGTGGCAAG     |
| M196BotV6800R  | CCTCGTGTGCAACGAAGTGT     |
| M196BotV6300R  | TCATTGAAGTCGATGCACAC     |
| M196BotV6300F  | GTGTGCATCGACTTCAATGA     |
| M196BotV5500R  | GCGGTACCGTGTGCGCCAGA     |
| M196BotV5500F  | TCTGGCGCACACGGTACGCC     |

|               |                      |
|---------------|----------------------|
| M196BotV4700R | CAGTGCGGCATTCTTCCAGC |
| M196BotV4700F | GCTGGAAGAATGCCGCACTG |
| M196BotV3800R | CGCGTATGTGTAAACCTTGC |
| M196BotV3800F | GCAAGGTTTACACATACGCG |

**Table S3: Species-specific primers** used to reconfirm the presences of mycoviruses in fungal hosts.

| Mycoviruses                                                   | Genes | Primer names | Primer sequences     |
|---------------------------------------------------------------|-------|--------------|----------------------|
| Sclerotinia sclerotiorum hypovirus 2<br>(SsHV2-Monilinia-TNS) | RdRp  | SsHV1F       | ACAGAAGCATGGTCGCAAAG |
|                                                               | RdRp  | SsHV1R       | CACGAAGGTCAACGCTTCAA |
| Fusarium poae virus 1<br>(FpV1-Monilinia-TNS)                 | RdRp  | FpV2F        | CGTCTTCCGTTATATCGCG  |
|                                                               | RdRp  | FPV2R        | ATAACGTGTTGGATGCGGTG |
|                                                               | CP    | FPV1F        | ACATCGAACTTGACTCCGGT |
|                                                               | CP    | FPV1R        | TTGGTGCGCAGAGTAGAAGA |
| Botrytis virus F<br>(BVF-Monilinia-TNS)                       | RdRp  | BV1F         | TCCCCTATCACCATACGCAC |
|                                                               | RdRp  | BV1R         | GCTAGGTAGTCTGCGGCTTA |
|                                                               | CP    | BV2F         | ACATAGCGAGCGCTTTCATT |
|                                                               | CP    | BV2R         | ATTCCGAAACGTGACTGGAG |

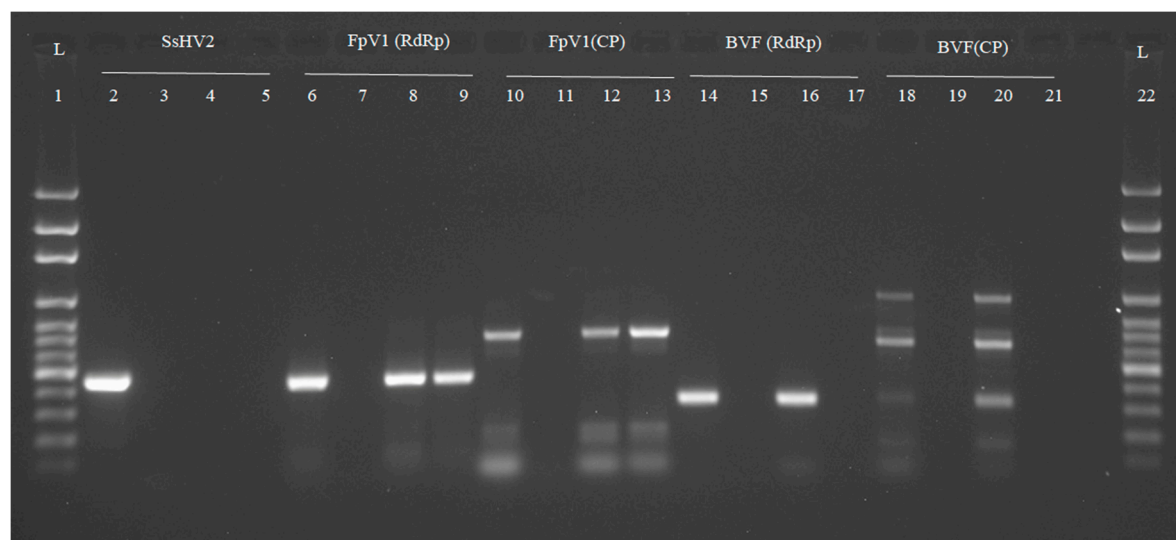

**Figure S1.** Presence and absence of mycoviruses in isogenic fungal lines treated to remove mycoviruses. Lanes 1 and 22: 100 bp DNA ladder. Five RT-PCR assays were done, each to test four isogenic lines, *viz* M196 (three viruses present), M196-1 (viruses absent), M196-4 (FpV1 and BVF present), and M196-6 (FpV1 present). Primers used are listed in Table S3. SsHV2 primers (lanes 2, 3, 4, 5); FpV1 (RdRp) primers (lanes 6, 7, 8, 9), FpV1 (CP) primers (lanes 10, 11, 12, 13), BVF (RdRp) primers (lanes 14, 15, 16, 17), BVF (CP) primers (lanes 18, 19, 20, 21).

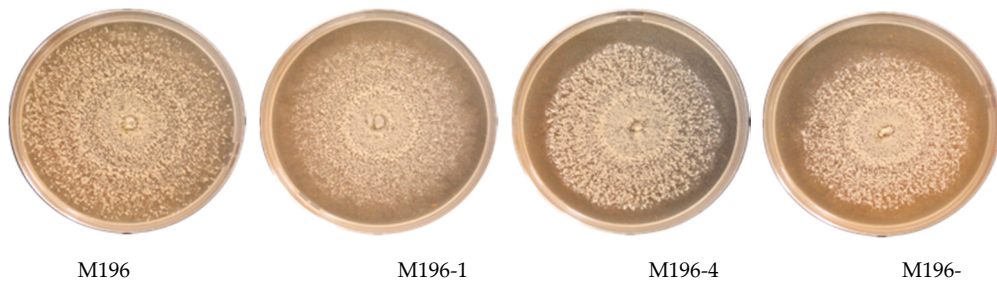

**Figure S2.** Comparison of typical plates of four isogenic lines of *M. fructicola* isolate M196 inoculated on V8 media after 5 days incubation in the dark at 25°C. Line M196 contains all three viruses, M196-1 contains no mycoviruses. M196-4 contains FpV1 and BVF and lacks SsHV2. M196-6 contains FpV1 and lacks SsHV2 and BVF.
